# Supplementary material for: Minor Non-Disabling Stroke Patients with Large Vessel Severe Stenosis or Occlusion Might Benefit from Thrombolysis
Source: MDPI journal article supplement (doi:10.3390/brainsci11070945), 2021-07-19
Supplement: s1 [file s1]

**Supplemental Table S1.** Univariate comparison of characteristics in alteplase-treated and untreated groups in minor non-disabling acute ischemic stroke patients with severe stenosis/occlusion of large vessels.

| Variables                                      | Alteplase-Treated<br>(n=78) | Untreated<br>(n=35) | P value |
|------------------------------------------------|-----------------------------|---------------------|---------|
| Age, years, $\pm$ SD                           | 70 $\pm$ 13                 | 73 $\pm$ 15         | 0.251   |
| Female (%)                                     | 29 (37.2)                   | 14 (40.0)           | 0.835   |
| NIHSS (IQR)                                    | 3 (2-3)                     | 2 (1-2)             | <0.001  |
| ODT, min (IQR)                                 | 127.0 (78.8-193.5)          | 120 (60.0-192.0)    | 0.700   |
| <b>Risk factors</b>                            |                             |                     |         |
| Hypertension (%)                               | 56 (71.8)                   | 26 (74.3)           | 0.824   |
| Diabetes (%)                                   | 15 (19.2)                   | 14 (40.0)           | 0.034   |
| Prior stroke or TIA (%)                        | 18 (23.1)                   | 10 (28.6)           | 0.638   |
| Atrial fibrillation (%)                        | 18 (23.1)                   | 10 (28.6)           | 0.638   |
| Smoking (%)                                    | 29 (37.2)                   | 5 (15.6)            | 0.040   |
| <b>Imaging data</b>                            |                             |                     |         |
| Site of vessel stenosis or occlusion (%)       |                             |                     | 0.620   |
| ICA                                            | 12 (15.4)                   | 4 (11.4)            |         |
| MCA                                            | 56 (71.8)                   | 26 (74.3)           |         |
| BA                                             | 3 (3.8)                     | 0 (0)               |         |
| PCA                                            | 7 (9.0)                     | 5 (14.3)            |         |
| ACA                                            | 0 (0)                       | 0 (0)               |         |
| Hemorrhagic transformation at 24 h, %          | 14 / 78 (17.9)              | 0 / 26 (0)          | 0.019   |
| Symptomatic intracranial hemorrhage at 24 h, % | 4 / 78 (5.1)                | 0 / 26 (0)          | 0.570   |

NIHSS, National Institutes of Health Stroke Scale score; ODT, Onset to Door Time; TIA, Transient Ischemic Attack; ICA, Internal Carotid Artery; MCA, Middle Cerebral Artery; BA, Basilar Artery; PCA, Posterior Cerebral Artery; ACA, Anterior Cerebral Artery.
